# Supplementary material for: Amyloid Burden Correlates with Electrocardiographic Findings in Patients with Cardiac Amyloidosis—Insights from Histology and Cardiac Magnetic Resonance Imaging
Source: MDPI journal article supplement (doi:10.3390/jcm13020368), 2024-01-09
Supplement: s1 [file s1]

**Table S1.** Cox regression analyses for the composite endpoint of all-cause death, heart transplantation, cardiovascular-related hospitalization.

| Variable                                                              | Crude hazard ratio | 95% Confidence interval | P value                        |
|-----------------------------------------------------------------------|--------------------|-------------------------|--------------------------------|
| <b>Univariable regression</b>                                         |                    |                         |                                |
| <b>Clinical and laboratory parameters</b>                             |                    |                         |                                |
| Body mass index, kg/m <sup>2</sup> (IQR)                              | 1.049              | 0.989 – 1.114           | 0.114                          |
| New York Heart Association class $\geq$ III, n (%)                    | 1.456              | 0.914 – 2.321           | 0.114                          |
| 6-Minute walk distance, m (IQR)                                       | 0.998              | 0.996 – 1.000           | 0.067                          |
| <b>Log N-terminal pro brain natriuretic peptide, pg/mL (IQR)</b>      | 1.456              | 1.186 – 1.787           | <b><math>\leq 0.001</math></b> |
| Troponin T, ng/L                                                      | 1.011              | 1.005 – 1.017           | <b><math>\leq 0.001</math></b> |
| Estimated glomerular filtration rate, mL/min/1.73m <sup>2</sup> (IQR) | 0.996              | 0.986 – 1.006           | 0.421                          |
| National Amyloidosis Center stage I-III                               | 1.297              | 0.952 – 1.768           | 0.099                          |
| <b>Electrocardiographical parameters</b>                              |                    |                         |                                |
| Total lead voltage, mm (IQR)                                          | 0.995              | 0.987 – 1.004           | 0.265                          |
| Low QRS voltage                                                       | 1.270              | 0.768 – 2.102           | 0.352                          |
| Heart rate, bpm (IQR)                                                 | 1.009              | 0.994 – 1.025           | 0.251                          |
| PQ interval, ms (IQR)                                                 | 1.008              | 0.999 – 1.017           | 0.086                          |
| QRS width, ms (IQR)                                                   | 1.000              | 0.992 – 1.008           | 0.980                          |
| QT time, ms (IQR)                                                     | 1.001              | 0.994 – 1.008           | 0.737                          |
| AV-Block, n (%)                                                       | 1.056              | 0.642 – 1.737           | 0.831                          |
| Any bundle branch block, n (%)                                        | 0.901              | 0.569 – 1.425           | 0.655                          |
| Incomplete left bundle branch block, n (%)                            | 0.669              | 0.265 – 1.692           | 0.396                          |
| Complete left bundle branch block, n (%)                              | 0.653              | 0.348 – 1.225           | 0.184                          |
| Complete right bundle branch block, n (%)                             | 1.930              | 0.764 – 4.879           | 0.165                          |
| <b>Left anterior fascicular block, n (%)</b>                          | 1.131              | 0.489 – 2.618           | 0.773                          |
| Bifascicular block n (%)                                              | 1.546              | 0.667 – 3.585           | 0.309                          |

|                                                         |       |               |              |
|---------------------------------------------------------|-------|---------------|--------------|
| Anterior pseudoinfarct pattern, n (%)                   | 0.966 | 0.530 – 1.761 | 0.911        |
| Ventricular premature complexes, n (%)                  | 1.360 | 0.621 – 2.979 | 0.442        |
| <b>Cardiac magnetic resonance imaging parameters</b>    |       |               |              |
| <b>Extracellular volume, % (IQR)</b>                    | 1.020 | 1.003 – 1.037 | <b>0.024</b> |
| LVEDD, mm (IQR)                                         | 1.039 | 1.000 – 1.079 | 0.053        |
| <b>RVEDD, mm (IQR)</b>                                  | 1.037 | 1.002 – 1.073 | <b>0.037</b> |
| Interventricular septum, mm (IQR)                       | 1.022 | 0.969 – 1.078 | 0.419        |
| Left atrial area, cm <sup>2</sup> (IQR)                 | 1.004 | 0.981 – 1.027 | 0.749        |
| <b>Right atrial area, cm<sup>2</sup> (IQR)</b>          | 1.045 | 1.014 – 1.077 | <b>0.004</b> |
| Ascending aorta, mm (IQR)                               | 1.010 | 0.957 – 1.066 | 0.715        |
| Pulmonary artery, mm (IQR)                              | 1.050 | 0.997 – 1.106 | 0.065        |
| Left ventricular ejection fraction, % (IQR)             | 0.983 | 0.965 – 1.002 | 0.080        |
| Left ventricular end-diastolic volume, mL (IQR)         | 1.000 | 0.995 – 1.005 | 0.990        |
| Left ventricular cardiac output, L/min (IQR)            | 1.003 | 0.835 – 1.206 | 0.972        |
| Left ventricular mass, g (IQR)                          | 1.002 | 0.998 – 1.007 | 0.349        |
| <b>Right ventricular ejection fraction, % (IQR)</b>     | 0.972 | 0.953 – 0.992 | <b>0.006</b> |
| <b>Right ventricular end-diastolic volume, mL (IQR)</b> | 1.006 | 1.001 – 1.011 | <b>0.018</b> |
| Right ventricular cardiac output, L/min (IQR)           | 1.112 | 0.946 – 1.308 | 0.197        |

IQR indicates interquartile range.
